# Supplementary material for: Single-cell RNA profiling links ncRNAs to spatiotemporal gene expression during C. elegans embryogenesis
Source: PubMed Central journal article supplement (PMC7606524; doi:10.1038/s41598-020-75801-3), 2020-11-02
Supplement: 41598_2020_75801_MOESM1_ESM.pdf [file 41598_2020_75801_MOESM1_ESM.pdf]

# Single-cell RNA profiling links ncRNAs to spatiotemporal gene expression during *C. elegans* embryogenesis

Yan Sun <sup>1, 2, 3, †</sup>, Qichao Yu <sup>2, 3, †</sup>, Lei Li <sup>1, 2</sup>, Zhanlong Mei <sup>2</sup>, Biaofeng Zhou <sup>1, 2, 3</sup>, Shang Liu <sup>1, 2, 3</sup>,  
Taotao Pan <sup>1, 2, 3</sup>, Liang Wu <sup>1, 2, 3</sup>, Ying Lei <sup>2, 3</sup>, Longqi Liu <sup>2, 3</sup>, Radoje Drmanac <sup>2 \*</sup>, Kun Ma <sup>2, 3 \*</sup>,  
Shiping Liu <sup>1, 2, 3 \*</sup>

† Equal contribution

\* Correspondence: [rdrmanac@completegenomics.com](mailto:rdrmanac@completegenomics.com) (Radoje Drmanac), [makun1@genomics.cn](mailto:makun1@genomics.cn)

(Kun Ma), [liushiping@genomics.cn](mailto:liushiping@genomics.cn) (Shiping Liu)

## Affiliations

<sup>1</sup> BGI Education Center, University of Chinese Academy of Sciences, Shenzhen 518083, China

<sup>2</sup> BGI-Shenzhen, Shenzhen 518083, China

<sup>3</sup> Shenzhen Key Laboratory of Single-Cell Omics, BGI-Shenzhen, Shenzhen 518100, China

## Emails:

Shiping Liu: [liushiping@genomics.cn](mailto:liushiping@genomics.cn); Kun Ma: [makun1@genomics.cn](mailto:makun1@genomics.cn); Radoje Drmanac:

[rdrmanac@completegenomics.com](mailto:rdrmanac@completegenomics.com); Yan Sun: [sunyan4@genomics.cn](mailto:sunyan4@genomics.cn); Qichao Yu:

[yuqichao@genomics.cn](mailto:yuqichao@genomics.cn); Lei Li: [lilei2@genomics.cn](mailto:lilei2@genomics.cn); Zhanlong Mei: [meizhanlong@genomics.cn](mailto:meizhanlong@genomics.cn);

Biaofeng Zhou: [zhoubiaofeng@genomics.cn](mailto:zhoubiaofeng@genomics.cn); Shang Liu: [liushang@genomics.cn](mailto:liushang@genomics.cn); Taotao Pan:

[pantaotao@genomics.cn](mailto:pantaotao@genomics.cn); Liang Wu: [wuliang@genomics.cn](mailto:wuliang@genomics.cn); Ying Lei: [leiying1@genomics.cn](mailto:leiying1@genomics.cn);

Longqi Liu: [liulongqi@genomics.cn](mailto:liulongqi@genomics.cn)

# Supplementary figures

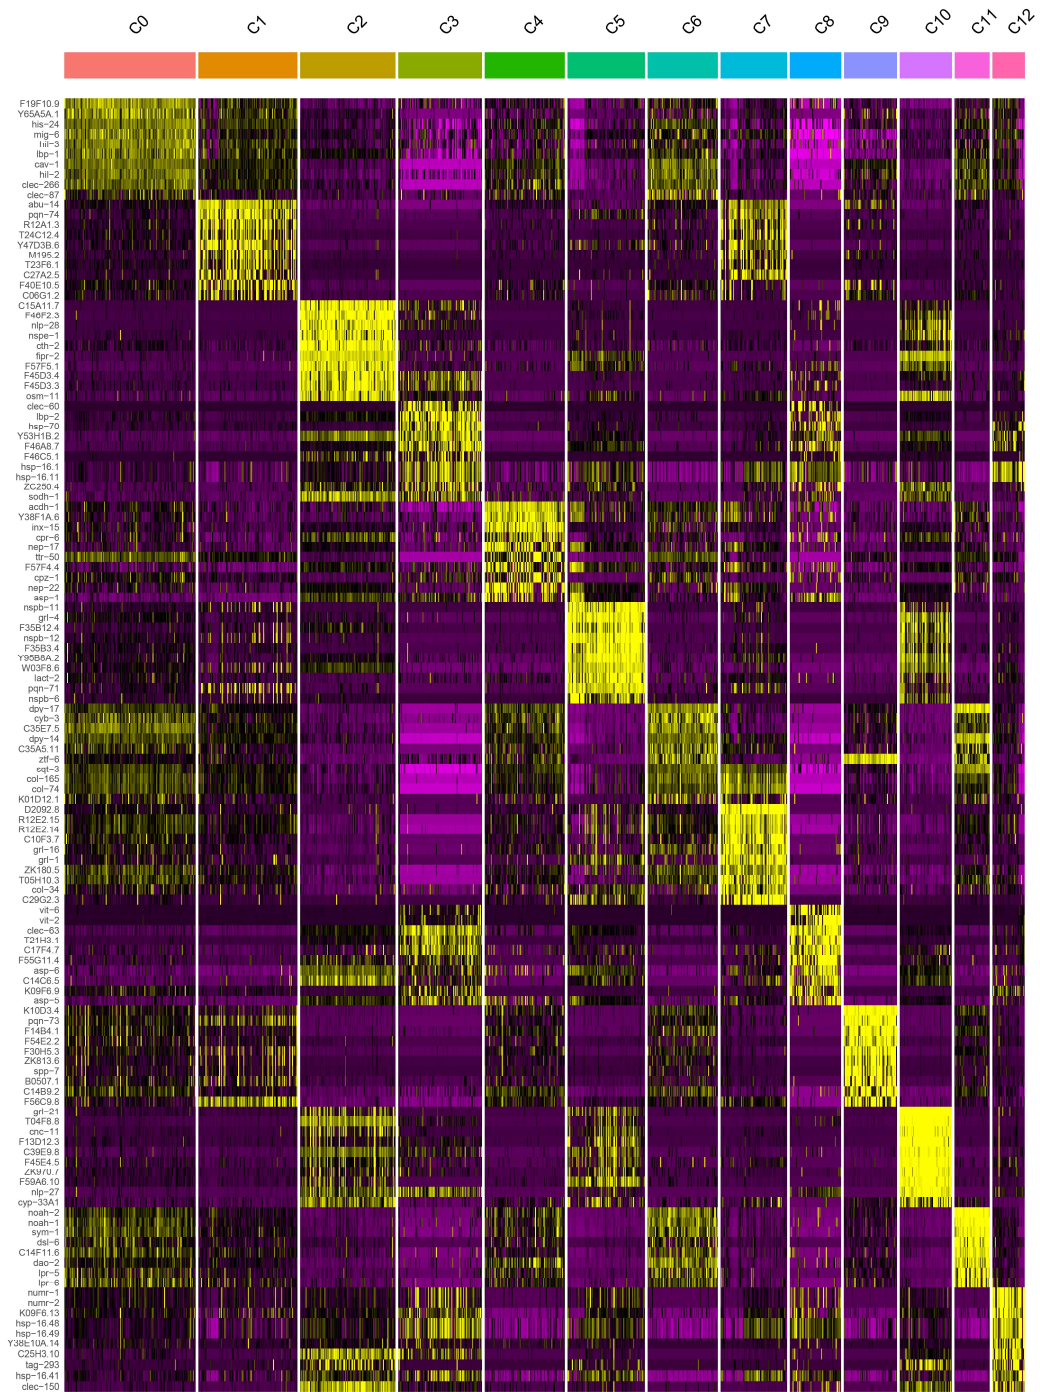

Figure S1. Heatmap of the top 10 protein-coding markers.

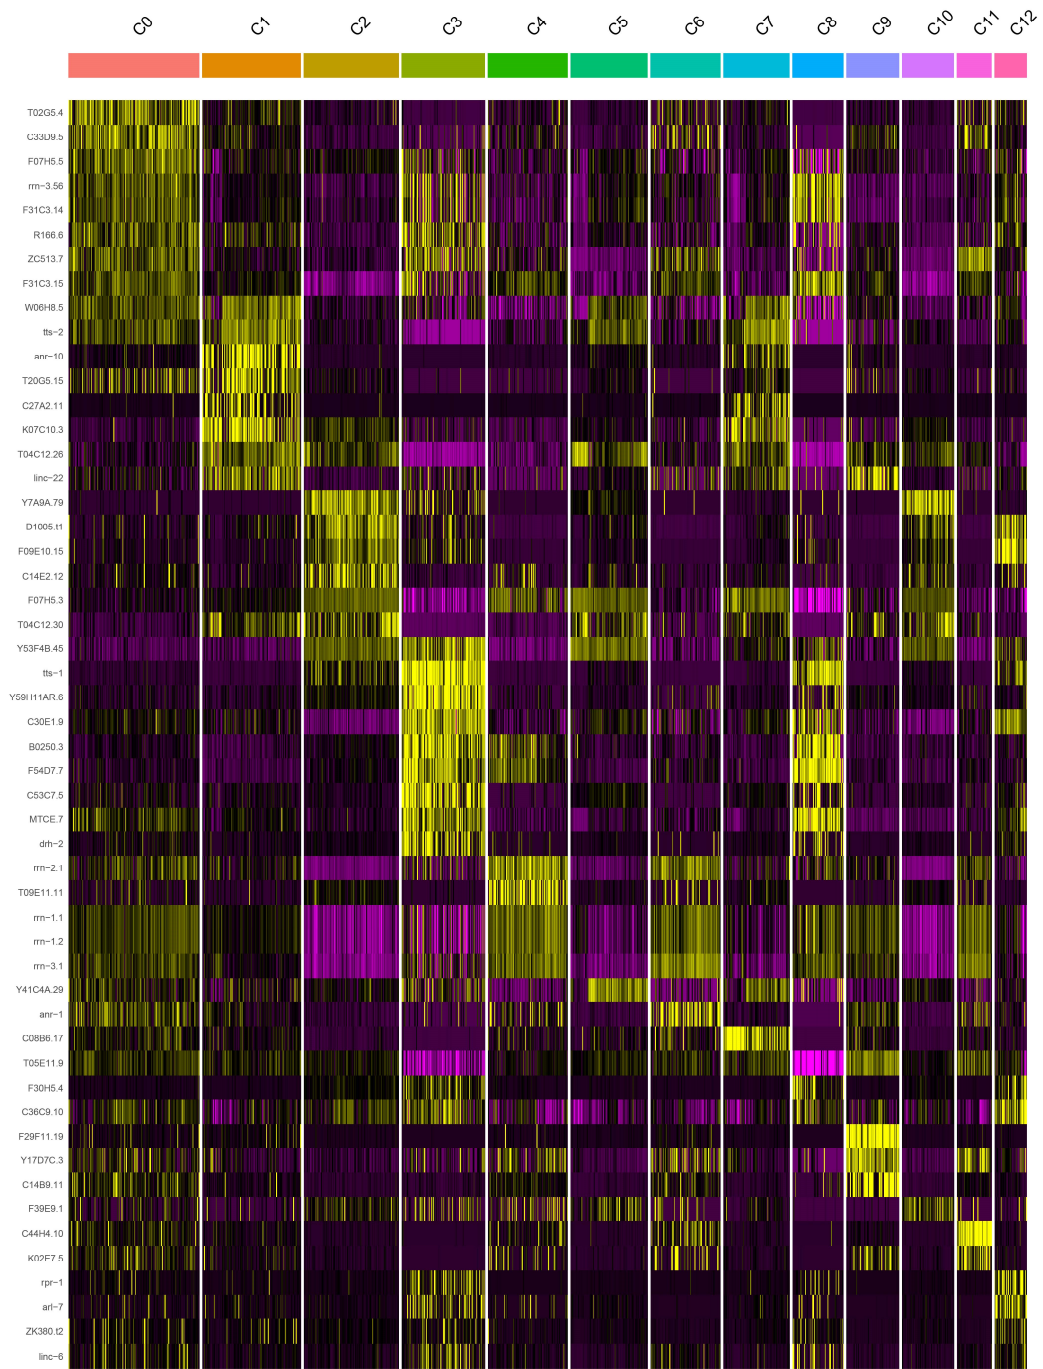

Figure S2. Heatmap of the top 10 ncRNA markers.

a

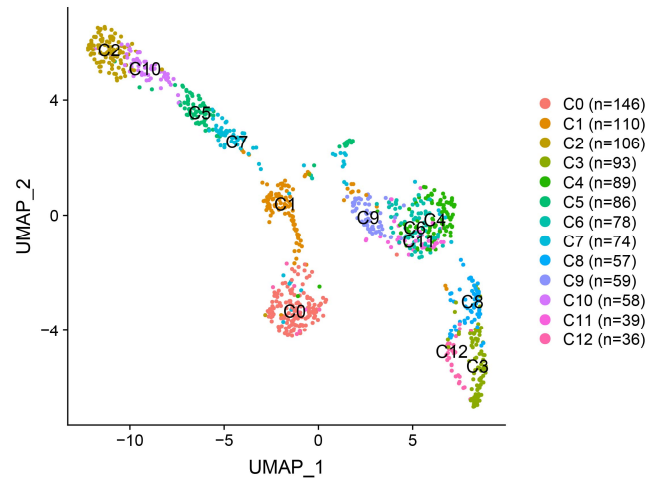

b

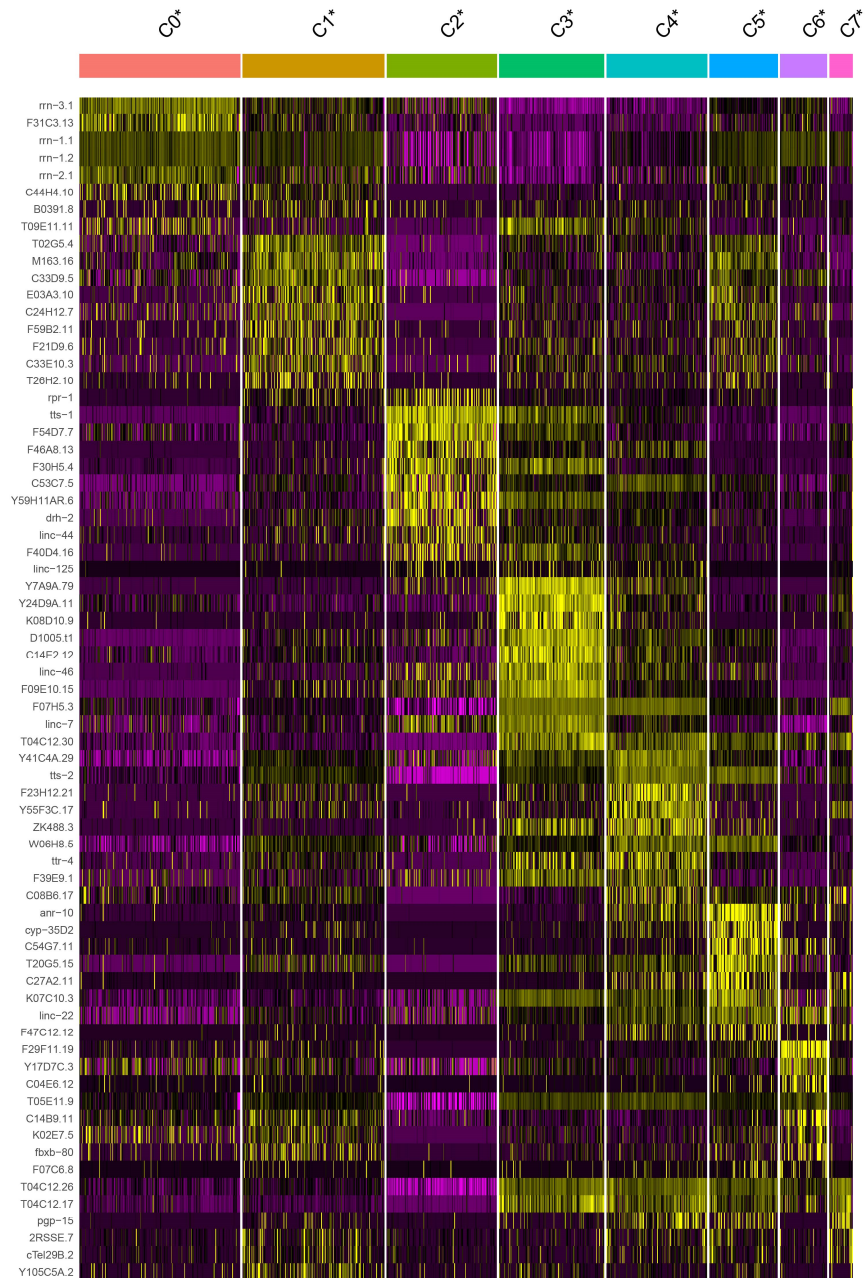

**Figure S3. Clustering of the embryonic cells.** (a) Cells are labelled with the clusters identified by combined protein-coding genes and ncRNAs (Fig. 2a). (b) The top 10 ncRNA markers of the eight clusters identified by ncRNAs alone.

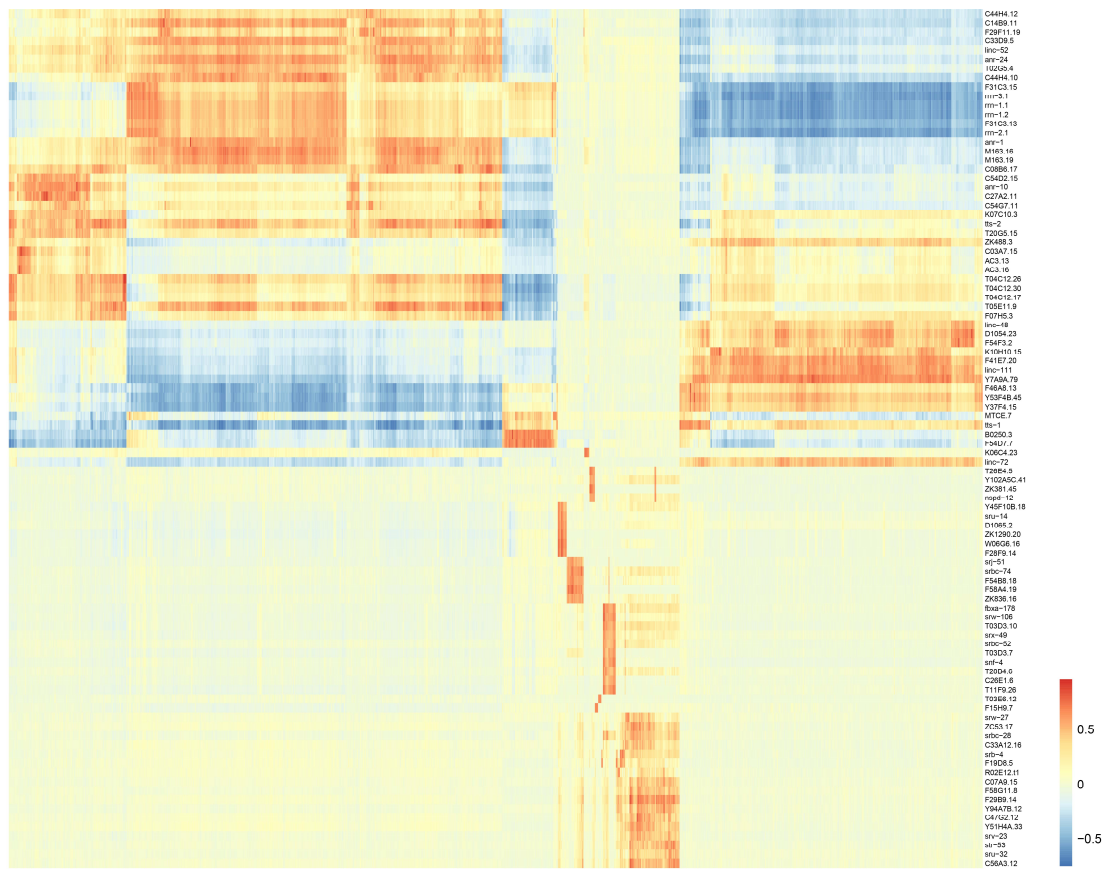

**Figure S4. Heatmap of ncRNA/protein-coding gene Pearson correlations.** Rows are the 94 ncRNAs, and columns are the 1208 protein-coding genes, the color represents the Pearson correlation (R). ncRNAs and protein-coding genes are hierarchical clustered.

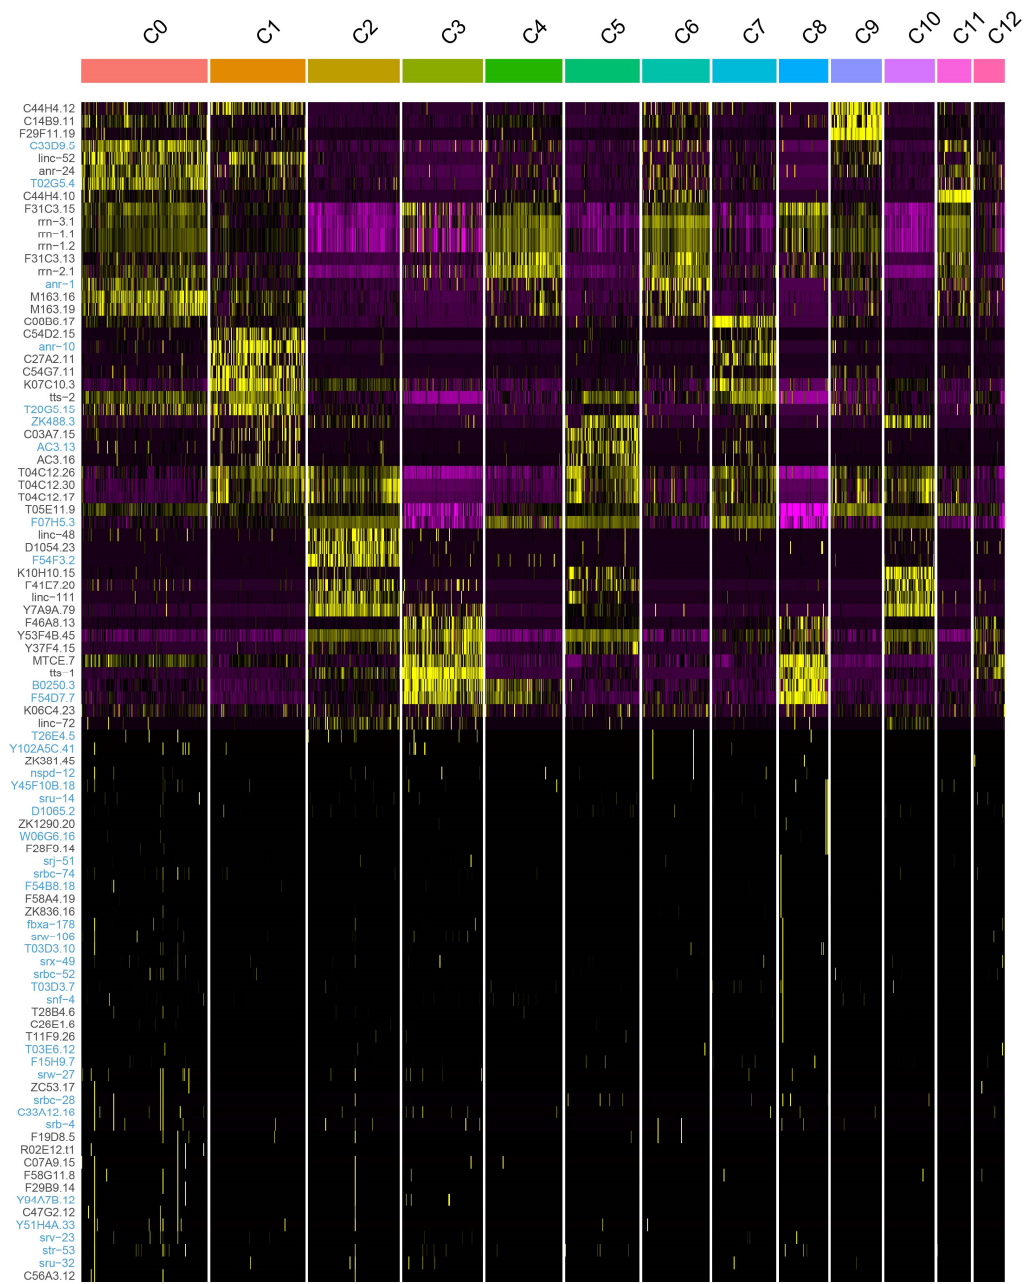

**Figure S5. Heatmap of the 94 ncRNAs.** Most of the ncRNAs showed cluster-specific expressions, except for most pseudogenes (terms in blue).

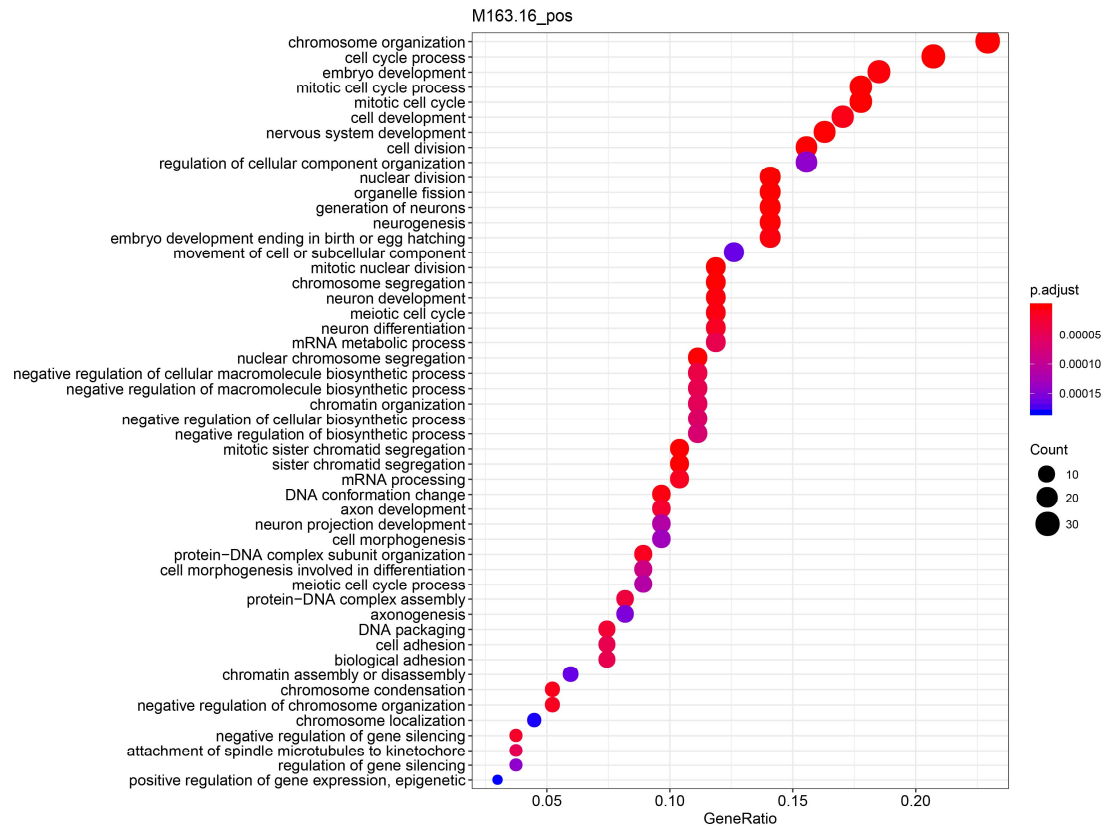

**Figure S6. The top 50 enriched GO terms of the 211 protein-coding genes that are positively co-expressed with ncRNA *M163.16*.**



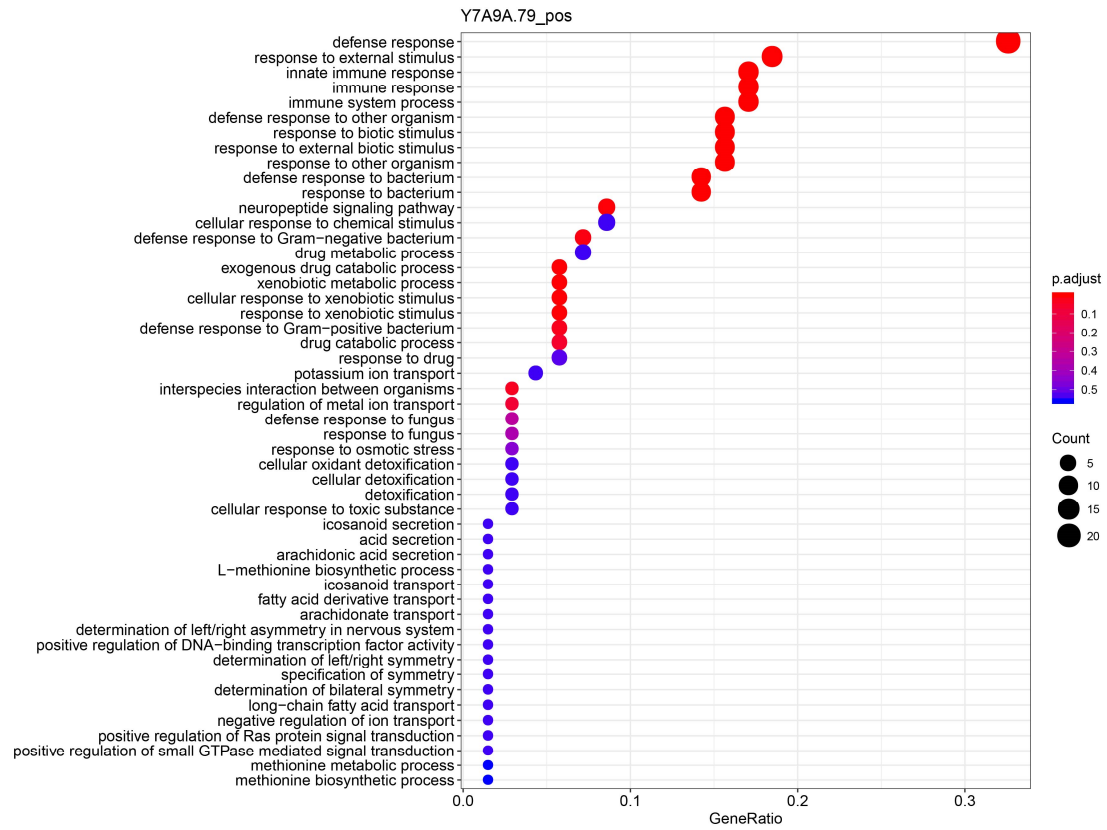

**Figure S7. The top 50 enriched GO terms of the 268 protein-coding genes that are positively co-expressed with ncRNA *Y7A9A.79*.**

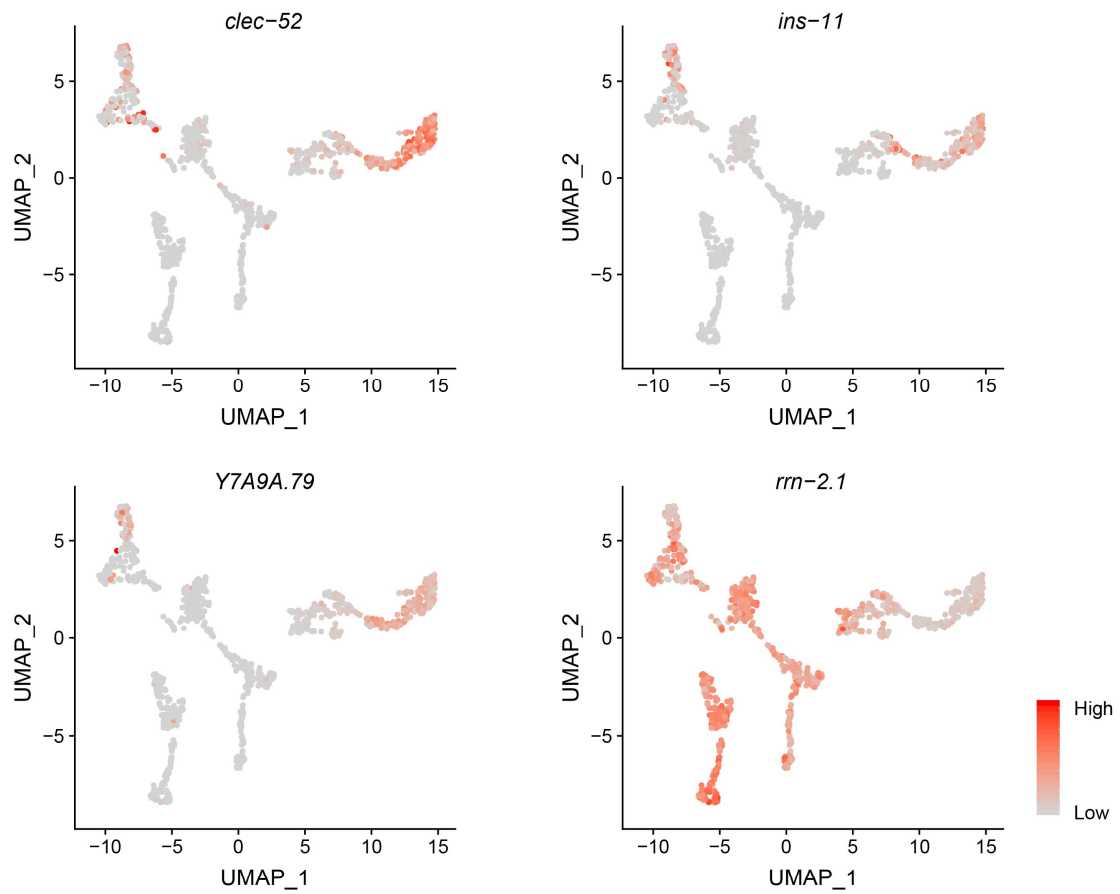

**Figure S8.** Feature plots showing expression levels of protein-coding genes *clec-52*, *ins-11* and ncRNAs *Y7A9A.79*, *rrn-2.1*. Protein-coding genes *clec-52*, *ins-11* are positively co-expressed with ncRNA *Y7A9A.79* and negatively co-expressed with ncRNA *rrn-2.1*.

## Supplementary tables

| ncRNA     | ncRNA_type | Number of co-expressed coding genes with R > 0.6 | Number of co-expressed coding genes with R > 0.7 | Number of co-expressed coding genes with R > 0.8 | Number of co-expressed coding genes with R > 0.9 | Number of co-expressed coding genes with R < -0.6 |
|-----------|------------|--------------------------------------------------|--------------------------------------------------|--------------------------------------------------|--------------------------------------------------|---------------------------------------------------|
| anr-1     | antisense  | 77                                               | 1                                                | 1                                                | 1                                                | 0                                                 |
| anr-10    | antisense  | 71                                               | 4                                                | 1                                                | 1                                                | 0                                                 |
| D1054.23  | unknow     | 67                                               | 6                                                | 1                                                | 1                                                | 0                                                 |
| B0250.3   | pseudogene | 53                                               | 12                                               | 1                                                | 1                                                | 0                                                 |
| C27A2.11  | unknow     | 50                                               | 12                                               | 3                                                | 1                                                | 0                                                 |
| T04C12.26 | unknow     | 49                                               | 8                                                | 4                                                | 1                                                | 3                                                 |
| C08B6.17  | unknow     | 40                                               | 10                                               | 1                                                | 1                                                | 1                                                 |
| Y7A9A.79  | unknow     | 268                                              | 36                                               | 1                                                | 0                                                | 1                                                 |
| M163.16   | unknow     | 211                                              | 23                                               | 1                                                | 0                                                | 0                                                 |
| T05E11.9  | unknow     | 155                                              | 21                                               | 1                                                | 0                                                | 4                                                 |
| anr-24    | antisense  | 154                                              | 8                                                | 0                                                | 0                                                | 0                                                 |
| F41E7.20  | unknow     | 127                                              | 4                                                | 0                                                | 0                                                | 0                                                 |
| linc-111  | lincRNA    | 122                                              | 2                                                | 0                                                | 0                                                | 0                                                 |
| tts-2     | unknow     | 116                                              | 23                                               | 0                                                | 0                                                | 2                                                 |
| C33D9.5   | pseudogene | 115                                              | 0                                                | 0                                                | 0                                                | 0                                                 |
| C44H4.10  | unknow     | 96                                               | 14                                               | 1                                                | 0                                                | 0                                                 |
| M163.19   | unknow     | 95                                               | 4                                                | 0                                                | 0                                                | 0                                                 |
| C14B9.11  | unknow     | 87                                               | 4                                                | 1                                                | 0                                                | 0                                                 |
| F54D7.7   | pseudogene | 55                                               | 20                                               | 0                                                | 0                                                | 5                                                 |
| F29B9.14  | unknow     | 42                                               | 9                                                | 1                                                | 0                                                | 0                                                 |
| rrn-1.1   | rRNA       | 40                                               | 2                                                | 0                                                | 0                                                | 60                                                |
| rrn-1.2   | rRNA       | 40                                               | 2                                                | 0                                                | 0                                                | 60                                                |
| F54F3.2   | pseudogene | 38                                               | 3                                                | 1                                                | 0                                                | 0                                                 |
| rrn-3.1   | rRNA       | 37                                               | 7                                                | 0                                                | 0                                                | 113                                               |
| rrn-2.1   | rRNA       | 30                                               | 1                                                | 0                                                | 0                                                | 68                                                |
| tts-1     | unknow     | 27                                               | 3                                                | 0                                                | 0                                                | 73                                                |
| F31C3.15  | unknow     | 26                                               | 3                                                | 0                                                | 0                                                | 26                                                |
| F29F11.19 | unknow     | 26                                               | 1                                                | 0                                                | 0                                                | 0                                                 |
| K10H10.15 | antisense  | 25                                               | 3                                                | 1                                                | 0                                                | 0                                                 |
| C54G7.11  | unknow     | 22                                               | 0                                                | 0                                                | 0                                                | 0                                                 |
| C54D2.15  | unknow     | 21                                               | 0                                                | 0                                                | 0                                                | 0                                                 |
| T04C12.30 | unknow     | 17                                               | 4                                                | 2                                                | 0                                                | 7                                                 |
| F58A4.19  | unknow     | 17                                               | 5                                                | 1                                                | 0                                                | 0                                                 |
| C56A3.12  | unknow     | 17                                               | 2                                                | 0                                                | 0                                                | 0                                                 |
| C03A7.15  | unknow     | 16                                               | 7                                                | 3                                                | 0                                                | 0                                                 |
| Y53F4B.45 | unknow     | 15                                               | 3                                                | 2                                                | 0                                                | 13                                                |

|            |            |    |   |   |   |   |
|------------|------------|----|---|---|---|---|
| srbc-74    | pseudogene | 12 | 2 | 0 | 0 | 0 |
| W06G6.16   | pseudogene | 11 | 5 | 0 | 0 | 0 |
| T11F9.26   | unknow     | 11 | 2 | 0 | 0 | 0 |
| ZC53.17    | unknow     | 11 | 2 | 0 | 0 | 0 |
| snf-4      | pseudogene | 10 | 1 | 0 | 0 | 0 |
| C47G2.12   | unknow     | 10 | 3 | 1 | 0 | 0 |
| T04C12.17  | unknow     | 10 | 3 | 0 | 0 | 0 |
| T02G5.4    | pseudogene | 9  | 0 | 0 | 0 | 0 |
| str-53     | pseudogene | 9  | 3 | 0 | 0 | 0 |
| Y51H4A.33  | pseudogene | 9  | 0 | 0 | 0 | 0 |
| F07H5.3    | pseudogene | 9  | 0 | 0 | 0 | 0 |
| F28F9.14   | unknow     | 8  | 5 | 0 | 0 | 0 |
| ZK1290.20  | unknow     | 8  | 3 | 0 | 0 | 0 |
| srw-106    | pseudogene | 8  | 4 | 0 | 0 | 0 |
| Y94A7B.12  | pseudogene | 8  | 2 | 0 | 0 | 0 |
| fbxa-178   | pseudogene | 8  | 4 | 0 | 0 | 0 |
| F31C3.13   | unknow     | 7  | 0 | 0 | 0 | 0 |
| ZK381.45   | unknow     | 7  | 2 | 0 | 0 | 0 |
| D1065.2    | pseudogene | 7  | 1 | 0 | 0 | 0 |
| F58G11.8   | unknow     | 7  | 0 | 0 | 0 | 0 |
| T20G5.15   | pseudogene | 7  | 0 | 0 | 0 | 0 |
| linc-52    | lincRNA    | 6  | 1 | 0 | 0 | 0 |
| MTCE.7     | rRNA       | 6  | 0 | 0 | 0 | 0 |
| srb-4      | pseudogene | 6  | 2 | 0 | 0 | 0 |
| sru-14     | pseudogene | 6  | 1 | 0 | 0 | 0 |
| T03D3.7    | pseudogene | 6  | 1 | 0 | 0 | 0 |
| T03D3.10   | pseudogene | 6  | 1 | 0 | 0 | 0 |
| F19D8.5    | unknow     | 6  | 1 | 0 | 0 | 0 |
| K06C4.23   | unknow     | 6  | 4 | 0 | 0 | 0 |
| AC3.16     | unknow     | 6  | 2 | 2 | 0 | 0 |
| srbc-28    | pseudogene | 5  | 0 | 0 | 0 | 0 |
| C26E1.6    | unknow     | 5  | 0 | 0 | 0 | 0 |
| F54B8.18   | pseudogene | 5  | 1 | 0 | 0 | 0 |
| ZK836.16   | unknow     | 5  | 0 | 0 | 0 | 0 |
| sru-32     | pseudogene | 5  | 0 | 0 | 0 | 0 |
| srv-23     | pseudogene | 5  | 0 | 0 | 0 | 0 |
| Y102A5C.41 | pseudogene | 5  | 0 | 0 | 0 | 0 |
| linc-48    | lincRNA    | 5  | 0 | 0 | 0 | 0 |
| linc-72    | lincRNA    | 5  | 0 | 0 | 0 | 0 |
| AC3.13     | pseudogene | 5  | 0 | 0 | 0 | 0 |
| K07C10.3   | unknow     | 5  | 0 | 0 | 0 | 0 |
| C44H4.12   | unknow     | 4  | 1 | 0 | 0 | 0 |
| Y45F10B.18 | pseudogene | 4  | 0 | 0 | 0 | 0 |

|           |            |   |   |   |   |    |
|-----------|------------|---|---|---|---|----|
| C07A9.15  | unknow     | 4 | 0 | 0 | 0 | 0  |
| srw-27    | pseudogene | 4 | 0 | 0 | 0 | 0  |
| srx-49    | pseudogene | 4 | 0 | 0 | 0 | 0  |
| T03E6.12  | pseudogene | 4 | 1 | 0 | 0 | 0  |
| F15H9.7   | pseudogene | 4 | 1 | 0 | 0 | 0  |
| srbc-52   | pseudogene | 4 | 0 | 0 | 0 | 0  |
| R02E12.t1 | tRNA       | 4 | 0 | 0 | 0 | 0  |
| C33A12.16 | pseudogene | 4 | 0 | 0 | 0 | 0  |
| T28B4.6   | unknow     | 4 | 1 | 0 | 0 | 0  |
| T26E4.5   | pseudogene | 4 | 2 | 0 | 0 | 0  |
| nspd-12   | pseudogene | 4 | 0 | 0 | 0 | 0  |
| srj-51    | pseudogene | 4 | 0 | 0 | 0 | 0  |
| ZK488.3   | pseudogene | 4 | 0 | 0 | 0 | 0  |
| F46A8.13  | unknow     | 3 | 1 | 1 | 0 | 11 |
| Y37F4.15  | unknow     | 3 | 1 | 0 | 0 | 8  |

**Table S1. Numbers of co-expressed protein-coding genes of the 94 ncRNAs at different cut offs of Pearson correlation (R).** ncRNAs in blue are co-expressed with more protein-coding genes negatively than positively. Seven ncRNAs were co-expressed with protein-coding genes with  $R > 0.9$ .

| ncRNA1     | ncRNA2    | correlation | p-value | ncRNA1     | ncRNA2    | correlation | p-value |
|------------|-----------|-------------|---------|------------|-----------|-------------|---------|
| rrn-1.1    | rrn-1.2   | 0.99993203  | 0       | Y7A9A.79   | F31C3.15  | -0.6112374  | 0       |
| rrn-1.1    | rrn-2.1   | 0.85566248  | 0       | F31C3.13   | F31C3.15  | 0.64613356  | 0       |
| rrn-1.2    | rrn-2.1   | 0.85547601  | 0       | sru-32     | C56A3.12  | 0.69669586  | 0       |
| rrn-1.1    | rrn-3.1   | 0.91829737  | 0       | str-53     | C56A3.12  | 0.664568    | 0       |
| rrn-1.2    | rrn-3.1   | 0.91817701  | 0       | srbc-28    | C56A3.12  | 0.62874053  | 0       |
| rrn-2.1    | rrn-3.1   | 0.85960099  | 0       | F29B9.14   | C56A3.12  | 0.71796535  | 0       |
| snf-4      | srw-106   | 0.69924867  | 0       | snf-4      | T11F9.26  | 0.74324066  | 0       |
| srw-106    | srx-49    | 0.63096136  | 0       | srw-106    | T11F9.26  | 0.72822075  | 0       |
| snf-4      | srbc-52   | 0.61208274  | 0       | srx-49     | T11F9.26  | 0.60912872  | 0       |
| tts-2      | T05E11.9  | 0.63157825  | 0       | srbc-52    | T11F9.26  | 0.60920923  | 0       |
| F07H5.3    | T05E11.9  | 0.61562624  | 0       | fbxa-178   | T11F9.26  | 0.66328126  | 0       |
| snf-4      | fbxa-178  | 0.64723151  | 0       | T03D3.7    | T11F9.26  | 0.68535375  | 0       |
| srw-106    | fbxa-178  | 0.7734674   | 0       | T03D3.10   | T11F9.26  | 0.63290427  | 0       |
| srx-49     | fbxa-178  | 0.65934002  | 0       | C26E1.6    | T11F9.26  | 0.67908167  | 0       |
| B0250.3    | F54D7.7   | 0.70008587  | 0       | sru-14     | ZK1290.20 | 0.70699741  | 0       |
| sru-14     | D1065.2   | 0.65519831  | 0       | D1065.2    | ZK1290.20 | 0.70822522  | 0       |
| snf-4      | T03D3.7   | 0.65383248  | 0       | Y45F10B.18 | ZK1290.20 | 0.61989309  | 0       |
| srw-106    | T03D3.7   | 0.64607128  | 0       | W06G6.16   | ZK1290.20 | 0.82900613  | 0       |
| snf-4      | T03D3.10  | 0.62124729  | 0       | Y94A7B.12  | C07A9.15  | 0.7407668   | 0       |
| srw-106    | T03D3.10  | 0.69509307  | 0       | F29B9.14   | C07A9.15  | 0.75297142  | 0       |
| srx-49     | T03D3.10  | 0.61661403  | 0       | AC3.13     | AC3.16    | 0.63210857  | 0       |
| srbc-52    | T03D3.10  | 0.64904506  | 0       | C03A7.15   | AC3.16    | 0.6361805   | 0       |
| fbxa-178   | T03D3.10  | 0.73056286  | 0       | tts-2      | T04C12.26 | 0.68950594  | 0       |
| C33A12.16  | srbc-28   | 0.61933927  | 0       | F07H5.3    | T04C12.26 | 0.63442026  | 0       |
| fbxa-178   | srbc-28   | 0.60235829  | 0       | T05E11.9   | T04C12.26 | 0.70193437  | 0       |
| T03D3.10   | srbc-28   | 0.63805681  | 0       | T04C12.17  | T04C12.26 | 0.76293805  | 0       |
| srbc-74    | F54B8.18  | 0.67695387  | 0       | srbc-74    | ZK836.16  | 0.66974178  | 0       |
| sru-14     | W06G6.16  | 0.74059563  | 0       | F54B8.18   | ZK836.16  | 0.68591825  | 0       |
| D1065.2    | W06G6.16  | 0.79865896  | 0       | F58A4.19   | ZK836.16  | 0.66613015  | 0       |
| Y45F10B.18 | W06G6.16  | 0.65109622  | 0       | tts-2      | C08B6.17  | 0.64559694  | 0       |
| str-53     | Y94A7B.12 | 0.6033907   | 0       | C27A2.11   | C54D2.15  | 0.64283852  | 0       |
| rrn-1.1    | Y7A9A.79  | -0.6593736  | 0       | sru-14     | F28F9.14  | 0.73879253  | 0       |
| rrn-1.2    | Y7A9A.79  | -0.6589093  | 0       | D1065.2    | F28F9.14  | 0.73896214  | 0       |
| rrn-2.1    | Y7A9A.79  | -0.6287487  | 0       | Y45F10B.18 | F28F9.14  | 0.64735355  | 0       |
| rrn-3.1    | Y7A9A.79  | -0.6383281  | 0       | W06G6.16   | F28F9.14  | 0.86050264  | 0       |
| rrn-1.1    | F31C3.13  | 0.72310906  | 0       | ZK1290.20  | F28F9.14  | 0.82224064  | 0       |
| rrn-1.2    | F31C3.13  | 0.72331664  | 0       | srw-27     | ZC53.17   | 0.71911004  | 0       |
| rrn-2.1    | F31C3.13  | 0.75560002  | 0       | C33A12.16  | ZC53.17   | 0.63090273  | 0       |
| rrn-3.1    | F31C3.13  | 0.76838723  | 0       | srbc-28    | ZC53.17   | 0.67461908  | 0       |
| Y51H4A.33  | C47G2.12  | 0.61521184  | 0       | Y51H4A.33  | ZC53.17   | 0.60882716  | 0       |
| Y94A7B.12  | C47G2.12  | 0.65603179  | 0       | tts-2      | T04C12.30 | 0.6065825   | 0       |
| snf-4      | C26E1.6   | 0.65012133  | 0       | T05E11.9   | T04C12.30 | 0.6018009   | 0       |
| srw-106    | C26E1.6   | 0.67335574  | 0       | F54D7.7    | T04C12.30 | -0.6472885  | 0       |
| str-53     | F29B9.14  | 0.7429714   | 0       | T04C12.17  | T04C12.30 | 0.88755986  | 0       |
| Y51H4A.33  | F29B9.14  | 0.60568333  | 0       | T04C12.26  | T04C12.30 | 0.82546294  | 0       |
| Y94A7B.12  | F29B9.14  | 0.83168833  | 0       | Y7A9A.79   | F41E7.20  | 0.63086235  | 0       |
| C47G2.12   | F29B9.14  | 0.65140901  | 0       | Y7A9A.79   | line-111  | 0.67588921  | 0       |
| Y94A7B.12  | F58G11.8  | 0.62194991  | 0       | F41E7.20   | line-111  | 0.60930915  | 0       |
| F29B9.14   | F58G11.8  | 0.72970952  | 0       | T20G5.15   | anr-10    | 0.6249538   | 0       |
| sri-51     | F58A4.19  | 0.80034732  | 0       | C27A2.11   | anr-10    | 0.60815432  | 0       |
| srbc-74    | F58A4.19  | 0.70812233  | 0       | F54E3.2    | line-48   | 0.60591262  | 0       |
| F54B8.18   | F58A4.19  | 0.71363293  | 0       | T02G5.4    | anr-24    | 0.66728379  | 0       |
| T26E4.5    | ZK381.45  | 0.74990421  | 0       | M163.16    | anr-24    | 0.62891786  | 0       |
| M163.16    | M163.19   | 0.81224315  | 0       | F54E3.2    | D1054.23  | 0.69175615  | 0       |
| rrn-1.1    | F31C3.15  | 0.89781227  | 0       | tts-1      | F46A8.13  | 0.60215364  | 0       |
| rrn-1.2    | F31C3.15  | 0.89790626  | 0       | Y53F4B.45  | F46A8.13  | 0.67405603  | 0       |
| rrn-2.1    | F31C3.15  | 0.79426844  | 0       | Y53F4B.45  | Y37F4.15  | 0.70156101  | 0       |
| rrn-3.1    | F31C3.15  | 0.89963345  | 0       | F46A8.13   | Y37F4.15  | 0.64189397  | 0       |

**Table S2. Pearson correlations between each two of the 94 ncRNAs. Only those whose absolute**

values of the Pearson correlations (R) are greater than 0.6 are listed. Terms in red are co-expressed ncRNA pairs mentioned.
